# Supplementary material for: A multicentre randomised controlled trial of day hospital-based falls prevention programme for a screened population of community-dwelling older people at high risk of falls
Source: PubMed Central journal article supplement — Age Ageing. 2010 Sep 7;39(6):704–10. doi: 10.1093/ageing/afq096 (PMC2956530; doi:10.1093/ageing/afq096), 2010-09-07
Supplement: supp_afq096_afq096supp.pdf [file supp_afq096_afq096supp.pdf]

**Appendix 1 Secondary outcomes for function and fear of falling, by treatment arm.**

| Outcome                                       | Control                             | Intervention                        | Complete case analysis       | Imputed data                 |
|-----------------------------------------------|-------------------------------------|-------------------------------------|------------------------------|------------------------------|
|                                               | N=172<br>[number of missing values] | N=172<br>[number of missing values] | Adjusted odds ratio (95% CI) | Adjusted odds ratio (95% CI) |
| Barthel score<br>Median (IQR)                 | 19 (17-20)<br>[29]                  | 19 (17-20)<br>[35]                  | 1.4 (0.8-2.4)<br>p=0.18      | 1.4<br>(0.8-2.4)<br>p=0.25   |
| NEADL score<br>Median (IQR)                   | 56 (43.75-61)<br>[34]               | 53 (43-62)<br>[45]                  | 1.0 (0.5-1.8)<br>p=0.88      | 0.8<br>(0.5-1.5)<br>p=0.53   |
| Falls Efficacy<br>Scale score<br>Median (IQR) | 18 (10-41)<br>[29]                  | 16 (10-38)<br>[37]                  | 0.8 (0.4-1.3)<br>p=0.31      | 0.8<br>(0.4-1.3)<br>p=0.31   |
